# Supplementary material
Source: PubMed Central journal article supplement (PMC2841885)
Supplement: 0910001107_pnas.0910001107_SI.pdf [file 0910001107_pnas.0910001107_SI.pdf]

# Supporting Information

Reiner et al. 10.1073/pnas.0910001107

## SI Text

**Kinetic Model.** TTET coupled to a local or global conformational transition allows the determination of the equilibrium constant ( $K_{op}$ ) and of the microscopic rate constants ( $k_{op}$  and  $k_{cl}$ ) for the transition under equilibrium conditions, i.e. without perturbing the system. In addition, the rate constant for loop formation in the unfolded state,  $k_c$ , can be obtained (1). Prerequisite for the application of this method is that TTET through loop formation can occur in an unfolded or partially unfolded state (I) but not in the native state (N; see Scheme S1).

This mechanism is essentially identical to hydrogen-deuterium exchange kinetics that allow the determination of stability and dynamics of individual hydrogen bonds in proteins (2, 3).

Different kinetic regimes can be discriminated for TTET coupled to a conformational transition, depending on the relative values of  $k_{op}$ ,  $k_{cl}$ , and  $k_c$ . If the equilibrium strongly favors the native state, a single rate constant ( $\lambda$ ) for TTET will be observed with

$$\lambda = \frac{k_{op} \cdot k_c}{k_{cl} + k_c} \quad [S1]$$

If the conformational transition is much faster than loop formation ( $k_{cl}, k_{op} \gg k_c$ ), Eq. S1 simplifies to

$$\lambda = \frac{k_{op}}{k_{cl}} \cdot k_c = K_{op} \cdot k_c, \quad [S2]$$

which corresponds to the EX2-limit in hydrogen exchange. If unfolding is much slower than loop formation, Eq. S1 becomes

$$\lambda = k_{op}, \quad [S3]$$

which is the EX1-limit in hydrogen exchange. A shift between the EX1 and the EX2 exchange can occur if a change in experimental conditions has different effects on the different microscopic rate constants. In this case all three microscopic rate constants can be determined.

If both N and I are significantly populated, two apparent rate constants ( $\lambda_1$  and  $\lambda_2$ ) are observed, which are described by the general solution of the three-state model shown in Scheme 1

$$\lambda_{1,2} = \frac{1}{2}(k_{op} + k_{cl} + k_c \pm \sqrt{(k_{op} + k_{cl} + k_c)^2 - 4k_{op} \cdot k_c}) \quad [S4]$$

with the respective amplitudes

$$A_1 = \frac{1}{\lambda_1(\lambda_1 - \lambda_2)} \cdot ([I]_0 \cdot k_c \cdot (k_{op} - \lambda_1) + [N]_0 \cdot k_{op} \cdot k_c),$$
$$A_2 = \frac{1}{\lambda_2(\lambda_1 - \lambda_2)} \cdot ([I]_0 \cdot k_c \cdot (\lambda_2 - k_{op}) - [N]_0 \cdot k_{op} \cdot k_c). \quad [S5]$$

If the interconversion between the native and unfolded state is much slower than loop formation ( $k_{cl}, k_{op} \ll k_c$ ), Eq. S4 simplifies to

$$\lambda_1 = k_c, \quad \lambda_2 = k_{op}. \quad [S6]$$

These considerations show that analysis of the observed rate constants and amplitudes of TTET kinetics allows the determination of all microscopic rate constants for a conformational equilibrium with dynamics on a similar timescale or slower than TTET. Because TTET through loop formation occurs on the 10 to 100s of ns timescale, this method allows the probe of transitions that are  $10^8$  to  $10^6$  times faster than those accessible to hydrogen exchange. Even in cases when the conformational transition is much slower than the triplet lifetime of the donor, this method allows the determination of rate constant for loop formation in the unfolded state ( $k_c$ ) when U is populated to as little as 5%, i.e. under native solvent conditions (Eq. S6).

**Materials & Methods. Synthesis, labelling and purification of the HP35 variants.** The HP35 variants with canonical sequence

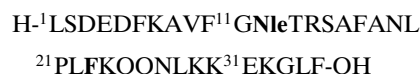

were labeled with Xan and Nal at the position indicated in the text. Xan was attached either to the N-terminal amino group of Leu1 (Xan0), to the  $\epsilon$ -amino group of Lys7, or to the  $\beta$ -amino group of the nonnatural amino acid  $\alpha,\beta$ -diaminopropionic acid replacing Phe35. Nal was introduced either at position 23 or at 35.

All HP35 variants were synthesized using standard 9-fluorenylmethyloxycarbonyl (Fmoc) chemistry on an Applied Biosystems 433A synthesizer. Couplings were performed with HBTU/HOBt or HATU on preloaded Tentagel S PHB-resin (Rapp Polymere). The xanthone derivative 9-oxoxanthene-2-carboxylic acid was synthesized according to Graham and Lewis (4), activated with PyBOP and coupled to a selectively deprotected amino functionality. This was either the N-terminal amino group, the  $\epsilon$ -amino group of Lys7, or the  $\beta$ -amino group of an  $\alpha,\beta$ -diaminopropionic acid incorporated at position 35. In the latter cases, methyltrityl was used as the orthogonal side-chain protection group, which was selectively removed with 3% (v/v) TFA in dichloromethane. Nal was incorporated via Fmoc-protected 1-naphthylalanine (Bachem). Final cleavage from the resin and deprotection of all other side chains was achieved with 94/2/2/2 TFA/TIPS/phenole/ $\text{H}_2\text{O}$  (v/v/v/v). All peptides were purified to >95% purity by preparative HPLC on a RP-8 column. Purity was checked by analytical HPLC and the identity verified by MALDI or electrospray ionization mass spectrometry.

**Sample preparation.** For all measurements 10 mM potassium phosphate buffer pH 7.0 was used. The concentration of the HP35 variants was determined by the Xan absorption band at 343 nm ( $\epsilon_{343} = 3900 \text{ M}^{-1} \text{ cm}^{-1}$ ). GdmCl and urea concentrations were calculated from the refractive index (5).

**TTET experiments.** TTET measurements were performed on a laser flash photolysis reaction analyzer (LKS.60) from Applied Photophysics with a Quantel Nd:YAG Brilliant laser. Xanthone triplet states were produced by a 4 ns laserflash at 354.6 nm (~50 mJ). Transient absorption traces were recorded at 590 nm (specific triplet absorbance band of xanthone) to monitor decay of the xanthone triplet state and at 420 nm (specific triplet absorbance band of naphthyl) to monitor formation of the naphthyl triplet state. Peptide concentrations were 50  $\mu\text{M}$ . Absence of

intermolecular TTET was confirmed by measuring Xan triplet decay of 50  $\mu\text{M}$  donor-only HP35 in the presence of 50  $\mu\text{M}$  acceptor-only HP35. All fitting procedures were performed with ProFit (QuantumSoft).

**Temperature dependence of TTET.** The temperature dependencies of the rate constants for TTET were measured between 5 and 30  $^{\circ}\text{C}$  and analyzed using the Arrhenius equation

$$k = A \cdot e^{-E_a/RT}, \quad [\text{S7}]$$

where  $A$  represents the preexponential factor and  $E_a$  is the activation energy.

1. Fierz B, Reiner A, and Kiefhaber T (2009) Local conformational fluctuations in  $\alpha$ -helices measured by fast triplet transfer. *Proc Natl Acad Sci USA* 106:1057–1062.
2. Hvidt A and Nielsen SO (1966) Hydrogen exchange in proteins. *Adv Prot Chem* 21:287–386.
3. Linderström-Lang K (1955) Deuterium exchange between peptides and water. *Chem Soc Spec Publ* 2:1–20.
4. Graham R and Lewis JR (1978) Synthesis of 9-oxoxanthen-2-carboxylic acids. *J Chem Soc Perkin Trans 1* 876–881.
5. Pace CN (1986) Determination and analysis of urea and guanidine hydrochloride denaturation curves. *Method Enzymol* 131:266–280.

The temperature dependence of the equilibrium between N and N' (Fig. 3) was fitted using the van't Hoff equation

$$\frac{d \ln K}{d1/T} = -\frac{\Delta H^0}{R}. \quad [\text{S8}]$$

**CD and NMR spectroscopy.** CD measurements were performed on an Aviv DS62 spectropolarimeter at 5.0  $^{\circ}\text{C}$ . Spectra were recorded with 50  $\mu\text{M}$  HP35 in a 0.1 cm cuvette. Equilibrium unfolding transitions were measured at 222 nm with 5  $\mu\text{M}$  HP35 in a 1 cm cuvette and evaluated according to Santoro and Bolen (6).

Proton NMR spectra were recorded on a Bruker Avance 600 MHz spectrometer at 25.0  $^{\circ}\text{C}$  and referenced to 2,2-dimethyl-2-silapentane-5-sulfonate at 0.0 ppm.

6. Santoro MM and Bolen DW (1988) Unfolding free energy changes determined by the linear extrapolation method. 1. Unfolding of phenylmethanesulfonyl alpha-chymotrypsin using different denaturants. *Biochemistry* 27:8063–8068.
7. McKnight CJ, Doering DS, Matsudaira PT, and Kim PS (1996) A thermostable 35-residue subdomain within villin headpiece *J Mol Biol* 260:126–134.
8. Gao J and Kelly JW (2008) Toward quantification of protein backbone hydrogen bonding energies: An energetic analysis of an amide-to-ester mutation in an  $\alpha$ -helix within a protein. *Protein Sci* 17:1096–1101.

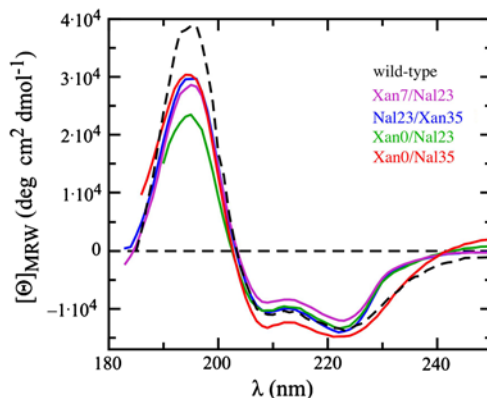

**Fig. S1.** Far-UV CD spectra of the different HP35 variants at 5.0  $^{\circ}\text{C}$ . The spectra are influenced by a positive CD band of naphthalene around 225 nm and by absorbance of Xan, which does not allow a quantitative comparison with the unlabeled wild-type protein. The spectrum of the Xan0/Nal35 variant is additionally influenced by the interaction between Xan and Nal (see Figs. 1 and 2). Measurements were performed in 10 mM potassium phosphate, pH 7.0. The spectrum of the wild-type protein was taken from ref. 7. In this case the solution additionally contained 150 mM NaCl and 500  $\mu\text{M}$  EDTA.
